# Supplementary material
Source: HighWire-hosted journal article supplement (https://www.jneurosci.org/highwire/filestream/602148/field_highwire_adjunct_files/0/Supplemental_Figures.pdf)
Supplement: Supplemental_Figures.pdf [file Supplemental_Figures.pdf]

## Supplementary materials

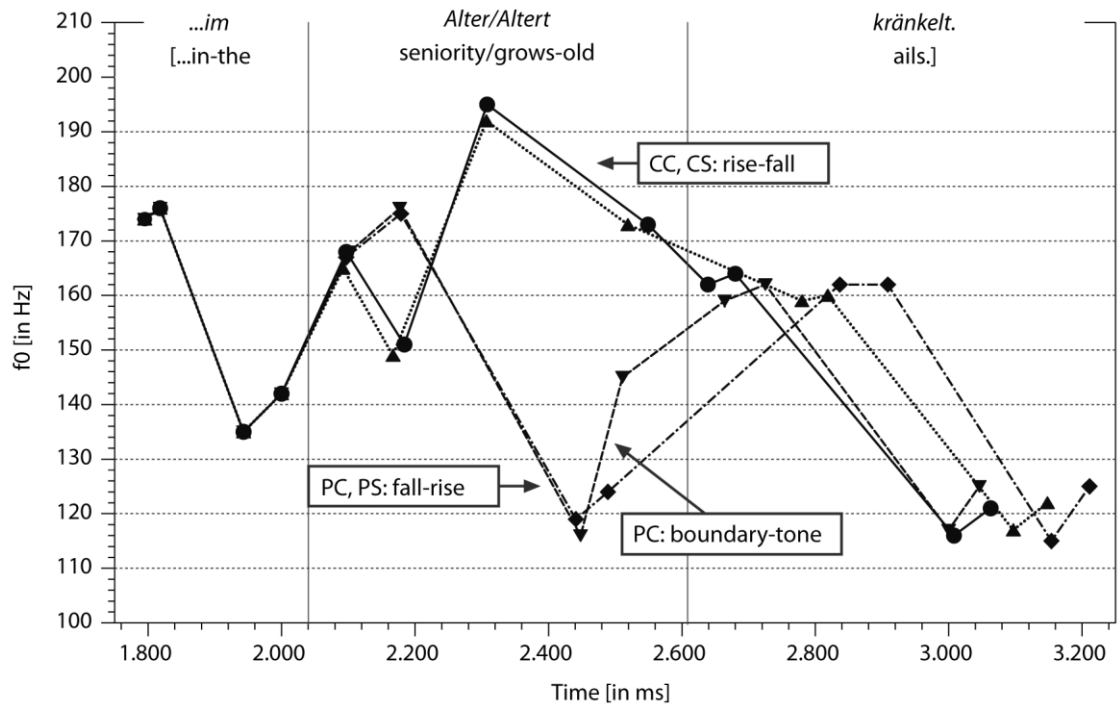

Figure S1: f0-contours for critical words in the four conditions. Note the rise-fall pattern for normal sentence endings and the inverse fall-rise pattern for the prosodic violations.

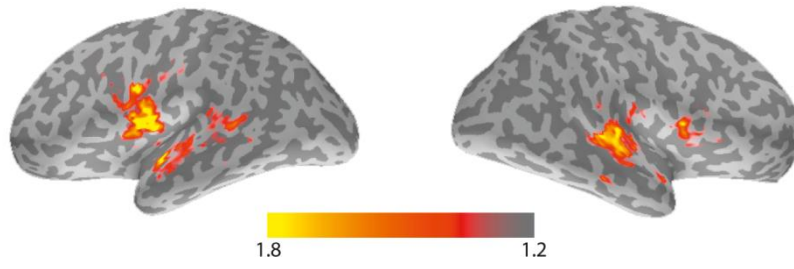

**Figure S2:** Grand average minimum norm solution (sLoreta) for all subjects and across the four experimental conditions.
